1 **Induction of AMPK activation by *N,N'*-Diarylurea**  
2 **FND-4b decreases growth and increases**  
3 **apoptosis in triple negative and estrogen-receptor**  
4 **positive breast cancers**

5

6 Jeremy Johnson<sup>1</sup>, Piotr Rychahou<sup>2,3</sup>, Vitaliy M. Sviripa<sup>4</sup>, Heidi L. Weiss<sup>2</sup>, Chunming  
7 Liu<sup>2,5</sup>, David S. Watt<sup>2,5,6</sup>, B. Mark Evers<sup>2,3\*</sup>

8

9 <sup>1</sup> Department of Toxicology and Cancer Biology, University of Kentucky, Lexington,  
10 Kentucky, United States of America

11

12 <sup>2</sup> Lucille Parker Markey Cancer Center, University of Kentucky, Lexington, Kentucky,  
13 United States of America

14

15 <sup>3</sup> Department of Surgery, University of Kentucky, Lexington, Kentucky, United States of  
16 America

17

18 <sup>4</sup> Department of Pharmaceutical Sciences, College of Pharmacy, University of Kentucky,  
19 Lexington, Kentucky, United States of America

20

21 <sup>5</sup> Department of Molecular and Cellular Biochemistry, College of Medicine, University of  
22 Kentucky, Lexington, Kentucky, United States of America

23

24 <sup>6</sup>Center for Pharmaceutical Research and Innovation, College of Pharmacy, University of  
25 Kentucky, Lexington, Kentucky, United States of America

26

27 \* Corresponding author

28 E-mail: [mark.evers@uky.edu](mailto:mark.evers@uky.edu) (BME)

29

## 30 Abstract

31 **Purpose:** Triple negative breast cancer (TNBC) is the most lethal and  
32 aggressive subtype of breast cancer. AMP-activated protein kinase (AMPK) is a major  
33 energy regulator that suppresses tumor growth, and 1-(3-chloro-4-  
34 ((trifluoromethyl)thio)phenyl)-3-(4-(trifluoromethoxy)phenyl)urea (FND-4b) is a novel  
35 AMPK activator that inhibits growth and induces apoptosis in colon cancer. The purpose  
36 of this project was to test the effects of FND-4b on AMPK activation, proliferation, and  
37 apoptosis in breast cancer with a particular emphasis on TNBC.

38 **Materials and methods:** (i) Estrogen-receptor positive breast cancer (ER+BC;  
39 MCF-7, and T-47D), TNBC (MDA-MB-231 and HCC-1806), and breast cancer stem cells  
40 were treated with FND-4b for 24h. Immunoblot analysis assessed AMPK, acetyl-CoA  
41 carboxylase (ACC), ribosomal protein S6, cyclin D1, and cleaved PARP. (ii)  
42 Sulforhodamine B growth assays were performed after treating ER+BC and TNBC cells  
43 with FND-4b for 72h. Proliferation was also assessed by counting cells after 72h of FND-  
44 4b treatment. (iii) Cell death ELISA assays were performed after treating ER+BC and  
45 TNBC cells with FND-4b for 72h.

46 **Results:** (i) FND-4b increased AMPK activation with concomitant decreases in  
47 ACC activity, phosphorylated S6, and cyclin D1 in all subtypes. (ii) FND-4b decreased  
48 proliferation in all cells, while dose-dependent growth decreases were found in ER+BC  
49 and TNBC. (iii) Increases in apoptosis were observed in ER+BC and the MDA-MB-231  
50 cell line with FND-4b treatment.

51 **Conclusions:** Our findings indicate that FND-4b decreases proliferation for a  
52 variety of breast cancers by activating AMPK and has notable effects on TNBC. The  
53 growth reductions were mediated through decreases in fatty acid synthesis (ACC),  
54 mTOR signaling (S6), and cell cycle flux (cyclin D1). ER+BC cells were more susceptible  
55 to FND-4b-induced apoptosis, but MDA-MB-231 cells still underwent apoptosis with  
56 higher dose treatment. Further development of FND compounds could result in a novel  
57 therapeutic for TNBC.

## 58 Introduction

59 Breast cancer is the most common cancer in women and the main cause of  
60 cancer-related death among women worldwide. In 2018 alone, there will be more than  
61 266,000 newly diagnosed cases of breast cancer in women in the United States and  
62 almost 41,000 deaths [1]. Up to 30% of patients develop metastases, and 90% of deaths  
63 result from metastases to the lung, brain, or bone [2]. Breast cancer is a heterogeneous  
64 disease separable into three main types: estrogen-receptor positive breast cancer  
65 (ER+BC), HER2-amplified breast cancer, and triple negative breast cancer (TNBC).

66 Although TNBC comprises only 15-20% of total cases, it is the most lethal and  
67 aggressive of the three types [3, 4].

68 The principal characteristics of TNBC include: (1) reduced expression of the  
69 estrogen and progesterone receptors and (2) no overexpression of HER2. TNBC affects  
70 a younger patient population than the population afflicted with other types of breast  
71 cancer and leads to an increased risk of recurrence and metastases [3]. Not surprisingly,  
72 patients with recurrent TNBC have a worse prognosis than that for patients with  
73 recurrent forms of other breast cancers [3]. In addition, patients with TNBC have limited  
74 therapeutic options because their tumors lack the traditional steroid hormone receptors  
75 and HER2 amplification. Instead, patients usually receive a drug cocktail that includes an  
76 anthracycline antineoplastic agent, a DNA alkylating agent, and a taxane [3]. These  
77 chemotherapeutic agents are toxic to normal and cancer cells alike and result in serious  
78 side-effects that are difficult for patients to tolerate. Recent efforts have focused on  
79 developing therapies that specifically target cancer cells without affecting normal cells.  
80 Because oncogenic transformation requires major metabolic reprogramming to produce  
81 energy, redox cofactors, and molecules involved in DNA modification, new agents that  
82 target the increased metabolism within cancer tissue more than the metabolism in  
83 normal tissue are attractive therapeutic options [2].

84 AMP-activated protein kinase (AMPK) is a cellular energy sensor that has  
85 important implications in cancer progression [5-16]. When activated by ATP depletion,  
86 the phosphorylated form of AMPK causes the following changes in TNBC: (1) inhibition  
87 of anabolic and oncogenic pathways, (2) attenuated mTOR signaling, (3) decreased cell  
88 proliferation, and (4) apoptosis [17-26]. Well-known AMPK activators, such as 5-  
89 aminoimidazole-4-carboxamide ribonucleotide (AICAR) and 2-deoxyglucose (2-DG),  
90 require high doses to affect cancer cell proliferation, which has led to their unsuccessful  
91 translation to the clinic for cancer therapy [12]. Among the attempts to produce new

92 AMPK activators with increased sensitivity, the fluorinated *N,N'*-diarylureas (FNDs) serve  
93 as activators that lead to phosphorylated AMPK at low concentrations [27, 28]. In  
94 particular, 1-(3-chloro-4-((trifluoromethyl)thio)phenyl)-3-(4-(trifluoromethoxy)phenyl)urea  
95 (FND-4b) inhibits growth and induces apoptosis in colorectal cancer cells, but its  
96 potential effects on other types of cancer remain unclear [27]. Because of the pressing  
97 need to develop new treatments for TNBC, we tested the effects of FND-4b on TNBC  
98 and compared the results with ER+BC. Importantly, we found that treatment with FND-  
99 4b led to AMPK activation, decreased cell cycle flux, and increased apoptosis in both  
100 subtypes. These findings indicate that FND compounds may be potential therapeutic  
101 options for TNBC.

## 102 **Materials and methods**

### 103 **Reagents, supplements, and antibodies**

104 1-(3-Chloro-4-((trifluoromethyl)thio)phenyl)-3-(4-(trifluoromethoxy)phenyl)urea  
105 (FND-4b) was synthesized and characterized as previously described [28]. Roswell Park  
106 Memorial Institute (RPMI) 1640 Medium and Eagle's Minimum Essential Medium  
107 (EMEM) were purchased from Sigma-Aldrich (St. Louis, MO). Dulbecco's Modified Eagle  
108 Medium (DMEM) was from Corning (Corning, NY). Human breast cancer stem cell  
109 complete growth medium was from Celprogen (Torrance, CA). MEM non-essential  
110 amino acid solution (100x), sodium pyruvate solution (100 mM), insulin solution (10  
111 mg/mL), penicillin-streptomycin (100x) (P/S), and fetal bovine serum (FBS) were from  
112 Sigma-Aldrich. Antibodies for pAMPK $\alpha$  (Thr172), total AMPK $\alpha$ , phosphorylated acetyl-  
113 CoA carboxylase (ACC), total ACC, phosphorylated ribosomal protein S6, total S6, and  
114 PARP were from Cell Signaling Technology (Danvers, MA). The cyclin D1 antibody was  
115 from Abcam (Cambridge, MA). The beta-actin antibody was from Sigma-Aldrich. The

116 Sulforhodamine B (SRB) Cytotoxicity Assay was from G-Biosciences (St. Louis, MO).

117 The Cell Death Detection ELISA<sup>PLUS</sup> assay was from Sigma-Aldrich.

## 118 **Cell culture**

119 MCF-7, T-47D, MDA-MB-231, HCC-1143, and HCC-1806 cells were purchased  
120 from ATCC, while breast cancer stem cells were purchased from Celprogen. MCF-7  
121 cells were maintained in EMEM containing 10% FBS, 1% P/S, 0.01 mg/mL insulin, 1x  
122 non-essential amino acids, and 1 mM sodium pyruvate. T-47D cells were maintained in  
123 RPMI containing 10% FBS, 1% P/S, and 0.2 Units/mL insulin. MDA-MB-231, HCC-1143,  
124 and HCC-1806 cells were maintained in RPMI with 10% FBS and 1% P/S. Breast cancer  
125 stem cells were maintained in breast cancer stem cell medium supplemented with 10%  
126 FBS and 1% P/S. All cells were grown in an incubator at 37°C and 5% CO<sub>2</sub>. For cell  
127 treatments, 7x10<sup>5</sup> MCF-7 and T-47D cells or 8x10<sup>5</sup> MDA-MB-231, HCC-1806, and  
128 breast cancer stem cells were seeded in 6-well plates and incubated overnight. The  
129 medium was removed on the following day, and cells were treated with fresh medium  
130 that contained different concentrations of FND-4b (0, 1, 2.5, 5, 10, and 20 µM) for 24 h  
131 before lysis.

## 132 **Western blot analysis**

133 After treatment, cells were scraped from the wells with 1x RIPA buffer containing  
134 serine protease inhibitor. The cells were lysed by incubating on ice for 20 min and  
135 vortexing 10 sec every 5 min. The lysates were centrifuged at 14,000 rpm and 4°C for 20  
136 min, and the protein concentration was determined using the Bradford method. The  
137 proteins were reduced and denatured by heating at 80°C for 10 min. An equal amount of  
138 protein was resolved on SDS-PAGE gels and transferred to PVDF membranes. The  
139 membranes were blocked with 10% milk before overnight incubation with primary  
140 antibodies at 4°C. On the following day, the membranes were washed with Tris buffered

141 saline with 0.1% tween-20 (TBST) for 5 min and again for 10 min. The membranes were  
142 subsequently incubated with the appropriate secondary antibody for 30 min at room  
143 temperature. The membranes were then washed with TBST for 15 min and again for 20  
144 min. Proteins were visualized with Amersham ECL (GE Healthcare) or Immobilon  
145 (Millipore). Membranes were stripped and reprobed as necessary.

## 146 **Cell counting assay**

147 Cells ( $1 \times 10^5$ ) were seeded in 6-well plates and incubated overnight. The medium  
148 was removed on the following day, and cells were grown in fresh medium that contained  
149 0 or 5  $\mu\text{M}$  FND-4b for 72 h. Cells were then washed with PBS, trypsinized, and counted  
150 with a Beckman-Coulter cell counter.

## 151 **SRB growth assay**

152 Cells ( $5 \times 10^3$  in 100  $\mu\text{L}$ ) were seeded in 96-well plates and incubated overnight.  
153 On the following day, fresh media was prepared to contain twice the desired  
154 concentrations of FND-4b (i.e., 5, 10, 20, and 40  $\mu\text{M}$ ). Then 100  $\mu\text{L}$  of the new media  
155 solutions were added to the wells without removing the old media; this yielded 200  $\mu\text{L}$   
156 per well and halved the FND-4b concentrations. Cells were grown in the media with  
157 different final concentrations of FND-4b (0, 2.5, 5, 10, and 20  $\mu\text{M}$ ) for 72 h before the  
158 proteins were fixed at 4°C for 1 h. The wells were washed 3 times with water and then  
159 dried for 30 min. The SRB dye solution (0.4%) was added to the wells and incubated for  
160 30 min. The excess dye was washed off with 1% acetic acid, and the wells were allowed  
161 to air dry. The dye was solubilized with a 10 mM Tris solution, and the absorbance was  
162 measured at 565 nm or—if the readings were outside of the instrument's linear range—  
163 at 490 nm.

## 164 **Cell Death Detection ELISA<sup>PLUS</sup> assay**

165           Cells ( $5 \times 10^3$  in 100  $\mu\text{L}$ ) were seeded in 96-well plates and incubated overnight.  
166    On the following day, fresh media was prepared to contain twice the desired  
167    concentrations of FND-4b (i.e., 5, 10, and 20  $\mu\text{M}$ ). Then 100  $\mu\text{L}$  of the new media  
168    solutions were added to the wells without removing the old media; this yielded 200  $\mu\text{L}$   
169    per well and halved the FND-4b concentrations. Cells were cultured in the media with  
170    different final concentrations of FND-4b (0, 2.5, 5, and 10  $\mu\text{M}$ ) for 72 h. Cells were then  
171    centrifuged at 200 x g for 10 min and lysed for 30 min with shaking. The lysates were  
172    centrifuged at 200 x g for 10 min, and 20  $\mu\text{L}$  of supernatant was transferred to  
173    streptavidin-coated wells. Then 80  $\mu\text{L}$  of the immunoreagent (anti-histone biotin and anti-  
174    DNA peroxidase) was added to the streptavidin-coated wells. The plates were shaken  
175    for 2 h at room temperature before the wells were rinsed three times with incubation  
176    buffer. Color change was initiated by adding the substrate ABTS to the wells, and the  
177    plates were shaken until the color change was sufficient for photometric analysis. After  
178    adding the ABTS Stop Solution, absorbance was measured at 405 nm.

## 179 **Statistical analysis**

180           Comparisons of SRB growth and ELISA assays across non-treated and different  
181    dose groups of FND-4b were performed using analysis of variance (ANOVA) with test for  
182    linear trend across dose levels. Pairwise comparisons of each FND-4b dose level versus  
183    non-treated group were performed within the ANOVA model with Holm's p-value  
184    adjustment for multiple testing. Comparisons of cell counting assays between control  
185    and FND-4b-treated groups were performed using two-sample t-tests with homogeneity  
186    of variance assessed for the use of the t-test for two group comparisons. Analyses were  
187    performed on data normalized with the non-treated group for the SRB growth and cell

188 counting assays and on the raw data for the ELISA assays. In all experiments, p-values  
189 less than 0.05 were considered significant.

## 190 **Results**

### 191 **Analysis of pAMPK $\alpha$ expression in breast cancer**

#### 192 **subtypes**

193 Prior work has suggested that TNBC cell lines and tissues have higher levels of  
194 phosphorylated and total forms of AMPK $\alpha$  than non-TNBC cells and tissues [29].  
195 Consequently, we compared levels of pAMPK $\alpha$  and total AMPK $\alpha$  in TNBC and ER+BC  
196 cells using western blotting. We found no difference in levels of phosphorylated or total  
197 AMPK $\alpha$  between two ER+BC cell lines (MCF-7 and T-47D) and three TNBC cell lines  
198 (MDA-MB-231, HCC-1143, and HCC-1806) (**Fig 1**).

199

200 **Fig 1 Examination of pAMPK $\alpha$  levels in breast cancer subtypes.** Equal numbers of  
201 MCF-7, T-47D, HCC-1143, MDA-MB-231, and HCC-1806 cells were incubated overnight  
202 before cell lysis. Western blot analyses were performed for total and phosphorylated  
203 forms of AMPK $\alpha$  and ACC. Beta-actin was used as the loading control.

### 204 **FND-4b activated AMPK $\alpha$ and downstream signaling**

#### 205 **pathways in breast cancer**

206 Because FND-4b activated AMPK $\alpha$  in colon cancer cells, we investigated its  
207 effects in several subtypes of breast cancer [27]. In particular, MCF-7, T-47D, MDA-MB-  
208 231, HCC-1806, and breast cancer stem cells were treated with fresh medium  
209 containing a range of FND-4b concentrations (0, 1, 2.5, 5, 10, and 20  $\mu$ M) for 24 h.



210 Protein levels of phosphorylated and total forms of AMPK $\alpha$ , acetyl-CoA carboxylase  
211 (ACC), and ribosomal protein S6, cyclin D1, and cleaved PARP were measured with  
212 immunoblotting. ACC and S6 were selected for analysis because they are downstream  
213 effectors of AMPK $\alpha$  that are phosphorylated and dephosphorylated, respectively, with  
214 AMPK $\alpha$  activation. As expected based on prior work, FND-4b treatment increased levels  
215 of pAMPK $\alpha$  in all five cell lines (**Fig 2**) [27]. Consistent with this result, increases in  
216 pACC and decreases in pS6 were also noted. Cyclin D1, an AMPK $\alpha$ -regulated marker  
217 for flux through the cell cycle, was decreased in all cell lines treated with FND-4b.  
218 Increases in the apoptotic indicator cleaved PARP were observed in MCF-7, MDA-MB-  
219 231, and HCC-1806 cells with AMPK $\alpha$  activation. FND-4b concentrations less than 5  $\mu$ M  
220 yielded minimal effects on AMPK signaling, but the 5  $\mu$ M dose yielded robust effects in  
221 all cells tested. The HCC-1806 cells were notable because AMPK $\alpha$  activation spiked  
222 with 5  $\mu$ M FND-4b treatment and then declined with concentrations higher than 5  $\mu$ M.  
223 Taken together, these results indicate that FND-4b activates AMPK $\alpha$  and its downstream  
224 signaling pathways in TNBC, ER+BC, and breast cancer stem cells.

225

226 **Fig 2 FND-4b activated AMPK $\alpha$  and its downstream signaling pathways in a dose-**  
227 **dependent manner in breast cancer.** Equal numbers of MCF-7, T-47D, MDA-MB-231,  
228 HCC-1806 or breast cancer stem cells were treated with fresh medium that contained  
229 different FND-4b concentrations (0, 1, 2.5, 5, 10, and 20  $\mu$ M) for 24 h. Western blot  
230 analysis was then performed for phosphorylated and total forms of AMPK $\alpha$ , ACC, and  
231 S6 as well as cyclin D1 and cleaved PARP. Beta-actin was used as the loading control.  
232 Treatment of the HCC-1806 cell line was repeated to confirm the spike in AMPK $\alpha$   
233 activation at the 5  $\mu$ M dosage with subsequent decreases at higher concentrations.

## 234 **FND-4b decreased growth of breast cancer subtypes in** 235 **a dose-dependent fashion**

236 AMPK $\alpha$  has been implicated as a tumor suppressor in breast cancer [17-26].  
237 Since FND-4b activated AMPK $\alpha$ , we measured its effects on the growth of breast cancer  
238 cells. Cell counting assays showed that treatment at 5  $\mu$ M FND-4b for 72 h resulted in  
239 significant growth inhibition of MCF-7, T-47D, MDA-MB-231, HCC-1806, and breast  
240 cancer stem cells (**Fig 3A**). Similar decreases occurred in all breast cancer subtypes  
241 with 5  $\mu$ M treatment. In addition, SRB growth assays indicated that treatment at various  
242 FND-4b concentrations (2.5, 5, 10, and 20  $\mu$ M) for 72 h yielded significant dose-  
243 dependent decreases in proliferation of MCF-7, T-47D, MDA-MB-231, and HCC-1806  
244 cells (**Fig 3B**). ER+BC cells were more sensitive than TNBC cells to FND-4b at 2.5  $\mu$ M,  
245 but the reductions were similar at higher concentrations. Similar growth inhibition at the 5  
246  $\mu$ M dosage between ER+BC and TNBC is consistent with the results from the cell  
247 counting assays. Taken together, these results illustrate that activation of AMPK $\alpha$  with  
248 FND-4b resulted in dose-dependent decreases in growth in ER+BC and TNBC.

249

250 **Fig 3. AMPK $\alpha$  activation with FND-4b decreased proliferation of breast cancer**  
251 **cells.** (A) Equal numbers of MCF-7, T-47D, MDA-MB-231, HCC-1806, or breast cancer  
252 stem cells were grown in medium containing 0 or 5  $\mu$ M FND-4b for 72 h followed by cell  
253 counting. (B) MCF-7, T-47D, MDA-MB-231, and HCC-1806 cells were grown in medium  
254 containing different concentrations of FND-4b (0, 2.5, 5, 10, and 20  $\mu$ M) for 72 h before  
255 SRB growth assays were performed. Data are presented as mean  $\pm$  SD from  
256 experiments performed in triplicate (cell counting) or sextuplicate (SRB assays) and are  
257 representative of three independent experiments. \* indicates p-value < 0.001.

## 258 **FND-4b increased apoptosis in ER+BC and TNBC**

259 While FND-4b's major effect is on cell growth, its treatment also increased  
260 apoptosis in colon cancer [27]. Therefore, we investigated apoptosis induction in breast  
261 cancer cells. As previously mentioned, treatment with FND-4b resulted in increased  
262 levels of cleaved PARP, a marker of apoptosis, in MDA-MB-231, HCC-1806, and MCF-7  
263 cells (see **Fig 2**). We also measured apoptosis with ELISA cell death assays that are  
264 more sensitive than western blotting assays. Significant increases in apoptosis were  
265 found in MCF-7 and T-47D cells—with MCF-7 cells being more sensitive (**Fig 4A-B**).  
266 Apoptosis was significantly increased in MDA-MB-231 cells with treatment at 10  $\mu$ M  
267 FND-4b, but apoptosis in HCC-1806 cells was not increased (**Fig 4C-D**).

268

### 269 **Fig 4. AMPK $\alpha$ activation with FND-4b increased apoptosis of breast cancer cells.**

270 Equal numbers of MCF-7, T-47D, MDA-MB-231, or HCC-1806 cells were cultured in  
271 medium containing different concentrations of FND-4b (0, 2.5, 5, and 10  $\mu$ M) for 72 h  
272 before ELISA cell death assays were performed. Data are presented as mean  $\pm$  SD from  
273 an experiment performed in triplicate and are representative of three independent  
274 experiments. \* indicates p-value < 0.001.

## 275 **Discussion**

276 The connection between AMPK activation and the inhibition of cancer cell growth  
277 prompted our interest in targeting AMPK and its downstream signaling pathways. AMPK  
278 activators such as AICAR and 2-DG have limited utility for patient care due to their high  
279 dose requirements [12]. We focused on novel small-molecule agents that activated  
280 AMPK at low concentrations and that stood a greater chance than these well-known  
281 AMPK activators of progressing toward the clinic. In this project, we examined the

282 effects of the AMPK activator FND-4b to determine its effects on ER+BC, TNBC, and  
283 breast cancer stem cells. FND-4b previously suppressed the growth of colorectal cancer  
284 cells and stem cells through activation of AMPK in the low micromolar range without  
285 affecting signaling through the Akt or ERK pathways [27, 28]. We found that treatment  
286 with FND-4b resulted in dose-dependent increases in AMPK activation in both breast  
287 cancer subtypes and in the stem cells.

288 Other investigators have also focused on discovering novel AMPK activators or  
289 repurposing current drugs that activate AMPK for breast cancer therapy. OSU-53 and  
290 RL-71 activated AMPK and exerted anti-tumor effects in TNBC at low micromolar doses  
291 [17, 19]. In addition, demethoxycurcumin (20  $\mu$ M) resulted in AMPK activation and large  
292 decreases in TNBC and ER+BC cell proliferation [24]. Finally, treatment of TNBC with  
293 the anti-depressant fluoxetine (0.5  $\mu$ M) caused AMPK activation and substantial  
294 reductions in cellular viability [25]. Taken together, these studies and ours suggest the  
295 merit in targeting the AMPK signaling pathway for the treatment of breast cancer.

296 We found that low micromolar concentrations of FND-4b substantially reduced  
297 the growth of TNBC. This is particularly important because of the inherent  
298 aggressiveness of TNBC that has higher rates of recurrence and metastasis than other  
299 breast cancer subtypes [3]. The seriousness of TNBC is further amplified by the fact that  
300 most breast cancer deaths result from metastatic lesions [2]. The difficulty in developing  
301 treatments for TNBC is due to the lack of the estrogen receptor and HER2 amplification.  
302 Drugs that target these proteins, such as trastuzumab and tamoxifen, are ineffective in  
303 TNBC. Instead, patients with TNBC typically receive a drug cocktail that damages  
304 normal cells in addition to the tumor and leads to significant side effects. Current efforts  
305 are focused on developing drugs that specifically target proteins or pathways that are  
306 exclusively altered in TNBC. Since expression of AMPK and pAMPK is lower in breast

307 cancer than normal tissue, this signaling pathway attracted our attention as an option for  
308 targeted therapy [30-32].

309 AMPK activation resulted in substantial decreases in cell proliferation in all breast  
310 cancer subtypes that were tested. These reductions in growth were due to AMPK's  
311 ability to regulate the cell cycle both directly and indirectly. Directly, AMPK activation can  
312 attenuate levels of cyclin D1, an important protein that controls cell cycle arrest during  
313 the G1 phase [33]. Prior work in ovarian cancer has suggested that AMPK activation  
314 causes degradation of cyclin D1 through a pathway involving glycogen synthase kinase  
315 3 $\beta$  [33]. Once cyclin D1 is degraded, cells are prevented from progressing past the G1  
316 phase [33]. We found that FND-4b-induced AMPK activation resulted in substantial  
317 decreases in cyclin D1 expression, resulting in cell cycle arrest. Indirectly, AMPK  
318 activation can affect the cell cycle through effects on mTOR and cellular metabolism.  
319 AMPK downregulates flux through the mTOR pathway, which can control the cell cycle  
320 through its downstream effectors S6 kinase 1 (S6K1) and eukaryotic translation initiation  
321 factor 4E-binding protein 1 [34]. In our study, we measured mTOR activity by blotting for  
322 levels of phosphorylated ribosomal protein S6, which is downstream from S6K1. We  
323 found decreases in S6 phosphorylation with FND-4b-induced AMPK activation,  
324 indicating less mTOR flux and cell cycle progression. Additionally, AMPK affects cell  
325 metabolism by phosphorylating and inhibiting ACC, which is the rate-limiting step in fatty  
326 acid synthesis. As a result, *de novo* lipogenesis is inhibited. Fatty acids are required for  
327 progression through the cell cycle—notably, during the G<sub>1</sub>-S and G<sub>2</sub>-M phases—and in  
328 their absence, cells will be unable to complete mitosis [16]. Instead they will be arrested  
329 at the G<sub>2</sub>-M checkpoint [16]. We showed that FND-4b-induced AMPK activation led to  
330 increased ACC phosphorylation, signifying less fatty acid synthesis and flux through the  
331 cell cycle.

332 In addition to inducing cell cycle arrest, AMPK can also act as a tumor  
333 suppressor by causing apoptosis [32]. We found that FND-4b causes apoptosis in a  
334 dose-dependent manner in ER+BC cells with ELISA cell death assays. We also showed  
335 clear increases in levels of cleaved PARP—an apoptotic indicator—in MCF-7 cells.  
336 TNBC cells were more resistant to apoptosis from FND-4b, but there was apoptosis in  
337 MDA-MB-231 cells with 10  $\mu$ M treatment. Additionally, we found increases in cleaved  
338 PARP in MDA-MB-231 and HCC-1806 cells with western blot. Taken together, these  
339 data indicate that ER+BC cells are more susceptible to FND-4b-induced apoptosis than  
340 TNBC. However, as suggested in previous work, the effects of FND-4b on cell cycle  
341 progression are more pronounced and consistent than on apoptosis [27].

## 342 **Conclusions**

343 We have shown that the novel compound FND-4b can activate AMPK in ER+BC,  
344 TNBC, and breast cancer stem cells. In addition, treatment with this compound can  
345 dose-dependently decrease proliferation and increase apoptosis in breast cancer cells.  
346 The effects on cellular growth are mediated via decreased cell cycle flux—as evidenced  
347 by reductions in cyclin D1 levels—and suppression of fatty acid synthesis and mTOR  
348 signaling. With such profound effects on proliferation, further development of FND  
349 compounds could lead to their inclusion in TNBC treatment regimens.

## 350 **Acknowledgements**

351 The Markey Cancer Center's Research Communications Office assisted with manuscript  
352 preparation, and the Biostatistics and Bioinformatics Shared Resource Facility of the  
353 University of Kentucky Markey Cancer Center performed statistical analysis.

354

## 355 **References**

- 356 1. American Cancer Society. Cancer Facts & Figures 2018. Atlanta: American  
357 Cancer Society; 2018.
- 358 2. Elia I, Schmieider R, Christen S, Fendt SM. Organ-Specific Cancer Metabolism  
359 and Its Potential for Therapy. Handbook of experimental pharmacology.  
360 2016;233:321-53. Epub 2015/04/29. doi: 10.1007/164\_2015\_10. PubMed PMID:  
361 25912014.
- 362 3. Andreopoulou E, Schweber SJ, Sparano JA, McDaid HM. Therapies for triple  
363 negative breast cancer. Expert Opin Pharmacother. 2015;16(7):983-98. doi:  
364 10.1517/14656566.2015.1032246. PubMed PMID: 25881743; PubMed Central  
365 PMCID: PMC5995333.
- 366 4. Yao H, He G, Yan S, Chen C, Song L, Rosol TJ, et al. Triple-negative breast  
367 cancer: is there a treatment on the horizon? Oncotarget. 2017;8(1):1913-24. doi:  
368 10.18632/oncotarget.12284. PubMed PMID: 27765921; PubMed Central PMCID:  
369 PMC5352107.
- 370 5. Faubert B, Vincent EE, Poffenberger MC, Jones RG. The AMP-activated protein  
371 kinase (AMPK) and cancer: many faces of a metabolic regulator. Cancer Lett.  
372 2015;356(2 Pt A):165-70. doi: 10.1016/j.canlet.2014.01.018. PubMed PMID:  
373 24486219.
- 374 6. Grahame Hardie D. AMP-activated protein kinase: a key regulator of energy  
375 balance with many roles in human disease. J Intern Med. 2014;276(6):543-59.  
376 doi: 10.1111/joim.12268. PubMed PMID: 24824502; PubMed Central PMCID:  
377 PMC5705060.

- 378 7. Hardie DG, Alessi DR. LKB1 and AMPK and the cancer-metabolism link - ten  
379 years after. *BMC Biol.* 2013;11:36. doi: 10.1186/1741-7007-11-36. PubMed  
380 PMID: 23587167; PubMed Central PMCID: PMC3626889.
- 381 8. Hardie DG, Ross FA, Hawley SA. AMP-activated protein kinase: a target for  
382 drugs both ancient and modern. *Chem Biol.* 2012;19(10):1222-36. doi:  
383 10.1016/j.chembiol.2012.08.019. PubMed PMID: 23102217; PubMed Central  
384 PMCID: PMC5722193.
- 385 9. Jeon SM. Regulation and function of AMPK in physiology and diseases. *Exp Mol*  
386 *Med.* 2016;48(7):e245. doi: 10.1038/emm.2016.81. PubMed PMID: 27416781;  
387 PubMed Central PMCID: PMC4973318.
- 388 10. Lage R, Dieguez C, Vidal-Puig A, Lopez M. AMPK: a metabolic gauge regulating  
389 whole-body energy homeostasis. *Trends Mol Med.* 2008;14(12):539-49. doi:  
390 10.1016/j.molmed.2008.09.007. PubMed PMID: 18977694.
- 391 11. Li W, Saud SM, Young MR, Chen G, Hua B. Targeting AMPK for cancer  
392 prevention and treatment. *Oncotarget.* 2015;6(10):7365-78. doi:  
393 10.18632/oncotarget.3629. PubMed PMID: 25812084; PubMed Central PMCID:  
394 PMC4480686.
- 395 12. Luo Z, Zang M, Guo W. AMPK as a metabolic tumor suppressor: control of  
396 metabolism and cell growth. *Future Oncol.* 2010;6(3):457-70. doi:  
397 10.2217/fon.09.174. PubMed PMID: 20222801; PubMed Central PMCID:  
398 PMC2854547.
- 399 13. Motoshima H, Goldstein BJ, Igata M, Araki E. AMPK and cell proliferation--AMPK  
400 as a therapeutic target for atherosclerosis and cancer. *J Physiol.* 2006;574(Pt  
401 1):63-71. doi: 10.1113/jphysiol.2006.108324. PubMed PMID: 16613876; PubMed  
402 Central PMCID: PMC1817805.



- 403 14. O'Neill HM, Holloway GP, Steinberg GR. AMPK regulation of fatty acid  
404 metabolism and mitochondrial biogenesis: implications for obesity. *Mol Cell*  
405 *Endocrinol.* 2013;366(2):135-51. doi: 10.1016/j.mce.2012.06.019. PubMed PMID:  
406 22750049.
- 407 15. Sanli T, Steinberg GR, Singh G, Tsakiridis T. AMP-activated protein kinase  
408 (AMPK) beyond metabolism: a novel genomic stress sensor participating in the  
409 DNA damage response pathway. *Cancer Biol Ther.* 2014;15(2):156-69. doi:  
410 10.4161/cbt.26726. PubMed PMID: 24100703; PubMed Central PMCID:  
411 PMC3928130.
- 412 16. Zadra G, Batista JL, Loda M. Dissecting the Dual Role of AMPK in Cancer: From  
413 Experimental to Human Studies. *Mol Cancer Res.* 2015;13(7):1059-72. doi:  
414 10.1158/1541-7786.MCR-15-0068. PubMed PMID: 25956158; PubMed Central  
415 PMCID: PMC4504770.
- 416 17. Gao J, Fan M, Peng S, Zhang M, Xiang G, Li X, et al. Small-molecule RL71-  
417 triggered excessive autophagic cell death as a potential therapeutic strategy in  
418 triple-negative breast cancer. *Cell Death Dis.* 2017;8(9):e3049. doi:  
419 10.1038/cddis.2017.444. PubMed PMID: 28906486; PubMed Central PMCID:  
420 PMC5636988.
- 421 18. Kim DE, Kim Y, Cho DH, Jeong SY, Kim SB, Suh N, et al. Raloxifene induces  
422 autophagy-dependent cell death in breast cancer cells via the activation of AMP-  
423 activated protein kinase. *Mol Cells.* 2015;38(2):138-44. doi:  
424 10.14348/molcells.2015.2193. PubMed PMID: 25537862; PubMed Central  
425 PMCID: PMC4332026.
- 426 19. Lee KH, Hsu EC, Guh JH, Yang HC, Wang D, Kulp SK, et al. Targeting energy  
427 metabolic and oncogenic signaling pathways in triple-negative breast cancer by a  
428 novel adenosine monophosphate-activated protein kinase (AMPK) activator. *J*

- 429 Biol Chem. 2011;286(45):39247-58. doi: 10.1074/jbc.M111.264598. PubMed  
430 PMID: 21917926; PubMed Central PMCID: PMC3234749.
- 431 20. Liu B, Fan Z, Edgerton SM, Deng XS, Alimova IN, Lind SE, et al. Metformin  
432 induces unique biological and molecular responses in triple negative breast  
433 cancer cells. Cell Cycle. 2009;8(13):2031-40. doi: 10.4161/cc.8.13.8814.  
434 PubMed PMID: 19440038.
- 435 21. Daurio NA, Tuttle SW, Worth AJ, Song EY, Davis JM, Snyder NW, et al. AMPK  
436 Activation and Metabolic Reprogramming by Tamoxifen through Estrogen  
437 Receptor-Independent Mechanisms Suggests New Uses for This Therapeutic  
438 Modality in Cancer Treatment. Cancer Res. 2016;76(11):3295-306. doi:  
439 10.1158/0008-5472.CAN-15-2197. PubMed PMID: 27020861; PubMed Central  
440 PMCID: PMC4895922.
- 441 22. Gollavilli PN, Kanugula AK, Koyyada R, Karnewar S, Neeli PK, Kotamraju S.  
442 AMPK inhibits MTDH expression via GSK3beta and SIRT1 activation: potential  
443 role in triple negative breast cancer cell proliferation. FEBS J.  
444 2015;282(20):3971-85. doi: 10.1111/febs.13391. PubMed PMID: 26236947.
- 445 23. Liu H, Scholz C, Zang C, Scheffe JH, Habbel P, Regierer AC, et al. Metformin  
446 and the mTOR inhibitor everolimus (RAD001) sensitize breast cancer cells to the  
447 cytotoxic effect of chemotherapeutic drugs in vitro. Anticancer Res.  
448 2012;32(5):1627-37. PubMed PMID: 22593441.
- 449 24. Shieh JM, Chen YC, Lin YC, Lin JN, Chen WC, Chen YY, et al.  
450 Demethoxycurcumin inhibits energy metabolic and oncogenic signaling pathways  
451 through AMPK activation in triple-negative breast cancer cells. J Agric Food  
452 Chem. 2013;61(26):6366-75. doi: 10.1021/jf4012455. PubMed PMID: 23777448.
- 453 25. Sun D, Zhu L, Zhao Y, Jiang Y, Chen L, Yu Y, et al. Fluoxetine induces  
454 autophagic cell death via eEF2K-AMPK-mTOR-ULK complex axis in triple

- 455 negative breast cancer. *Cell Prolif.* 2018;51(2):e12402. doi: 10.1111/cpr.12402.  
456 PubMed PMID: 29094413.
- 457 26. Hadad SM, Hardie DG, Appleyard V, Thompson AM. Effects of metformin on  
458 breast cancer cell proliferation, the AMPK pathway and the cell cycle. *Clin Transl*  
459 *Oncol.* 2014;16(8):746-52. doi: 10.1007/s12094-013-1144-8. PubMed PMID:  
460 24338509.
- 461 27. Kenlan DE, Rychahou P, Sviripa VM, Weiss HL, Liu C, Watt DS, et al.  
462 Fluorinated N,N'-Diarylureas As Novel Therapeutic Agents Against Cancer Stem  
463 Cells. *Mol Cancer Ther.* 2017;16(5):831-7. doi: 10.1158/1535-7163.MCT-15-  
464 0634. PubMed PMID: 28258165; PubMed Central PMCID: PMC5418095.
- 465 28. Sviripa V, Zhang W, Conroy MD, Schmidt ES, Liu AX, Truong J, et al.  
466 Fluorinated N,N'-diarylureas as AMPK activators. *Bioorg Med Chem Lett.*  
467 2013;23(6):1600-3. doi: 10.1016/j.bmcl.2013.01.096. PubMed PMID: 23414799;  
468 PubMed Central PMCID: PMC3594501.
- 469 29. Huang X, Li X, Xie X, Ye F, Chen B, Song C, et al. High expressions of LDHA  
470 and AMPK as prognostic biomarkers for breast cancer. *Breast.* 2016;30:39-46.  
471 doi: 10.1016/j.breast.2016.08.014. PubMed PMID: 27598996.
- 472 30. Al-Maghrabi J, Al-Sakkaf K, Qureshi IA, Butt NS, Damnhory L, Elshal M, et al.  
473 AMPK expression patterns are significantly associated with poor prognosis in  
474 breast cancer patients. *Ann Diagn Pathol.* 2017;29:62-7. doi:  
475 10.1016/j.anndiagpath.2017.05.012. PubMed PMID: 28807345.
- 476 31. Hadad SM, Baker L, Quinlan PR, Robertson KE, Bray SE, Thomson G, et al.  
477 Histological evaluation of AMPK signalling in primary breast cancer. *BMC*  
478 *Cancer.* 2009;9:307. doi: 10.1186/1471-2407-9-307. PubMed PMID: 19723334;  
479 PubMed Central PMCID: PMC2744705.

- 480 32. Khabaz MN, Al-Sakkaf K, Qureshi I, Butt N, Damnhory L, Elshal M, et al.  
481 Expression of p-AMPK is associated with hormone receptor phenotypes and  
482 lymph node metastasis in breast cancer. *International journal of clinical and*  
483 *experimental pathology*. 2017;10(6):7044-51.
- 484 33. Gwak H, Kim Y, An H, Dhanasekaran DN, Song YS. Metformin induces  
485 degradation of cyclin D1 via AMPK/GSK3beta axis in ovarian cancer. *Mol*  
486 *Carcinog*. 2017;56(2):349-58. doi: 10.1002/mc.22498. PubMed PMID: 27128966.
- 487 34. Fingar DC, Richardson CJ, Tee AR, Cheatham L, Tsou C, Blenis J. mTOR  
488 controls cell cycle progression through its cell growth effectors S6K1 and 4E-  
489 BP1/eukaryotic translation initiation factor 4E. *Mol Cell Biol*. 2004;24(1):200-16.  
490 PubMed PMID: 14673156; PubMed Central PMCID: PMC303352.
- 491  
492

493 **SUPPORTING INFORMATION**

494 Data for SRB growth assays, cell proliferation assays and ELISA assays.

495 Primary antibody information.

496

497

498 **FIGURES**

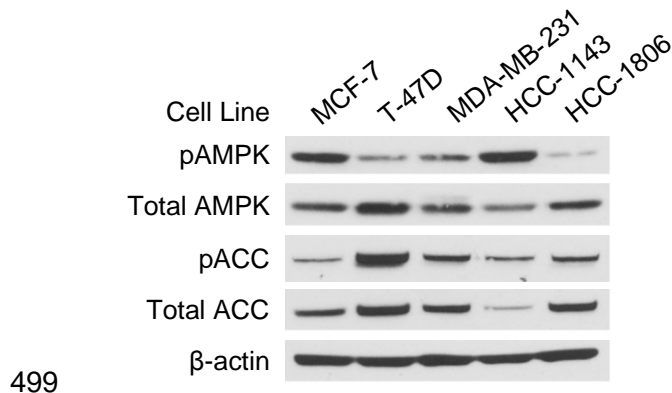

500 **Fig 1 Examination of pAMPK $\alpha$  levels in breast cancer subtypes.** Equal numbers of  
501 MCF-7, T-47D, HCC-1143, MDA-MB-231, and HCC-1806 cells were incubated overnight  
502 before cell lysis. Western blot analyses were performed for total and phosphorylated  
503 forms of AMPK $\alpha$  and ACC. Beta-actin was used as the loading control.

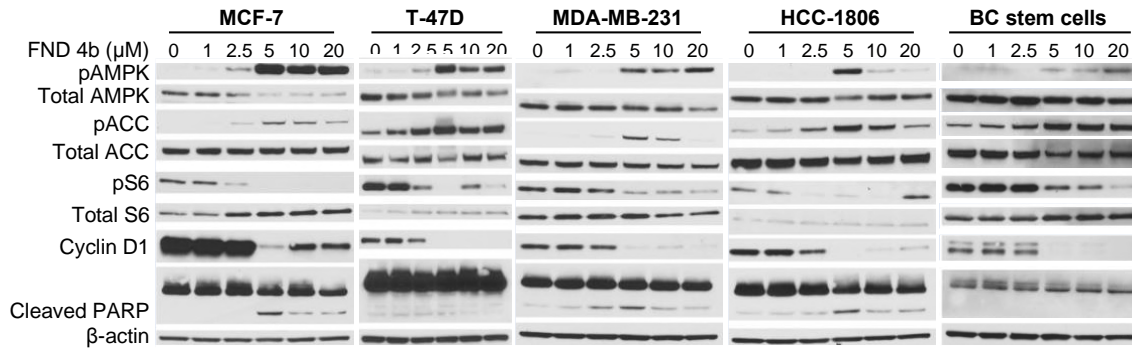

504

505 **Fig 2 FND-4b activated AMPK $\alpha$  and its downstream signaling pathways in a dose-**

506 **dependent manner in breast cancer.** Equal numbers of MCF-7, T-47D, MDA-MB-231,

507 HCC-1806 or breast cancer stem cells were treated with fresh medium that contained

508 different FND-4b concentrations (0, 1, 2.5, 5, 10, and 20  $\mu$ M) for 24 h. Western blot

509 analysis was then performed for phosphorylated and total forms of AMPK $\alpha$ , ACC, and

510 S6 as well as cyclin D1 and cleaved PARP. Beta-actin was used as the loading control.

511 Treatment of the HCC-1806 cell line was repeated to confirm the spike in AMPK $\alpha$

512 activation at the 5  $\mu$ M dosage with subsequent decreases at higher concentrations.

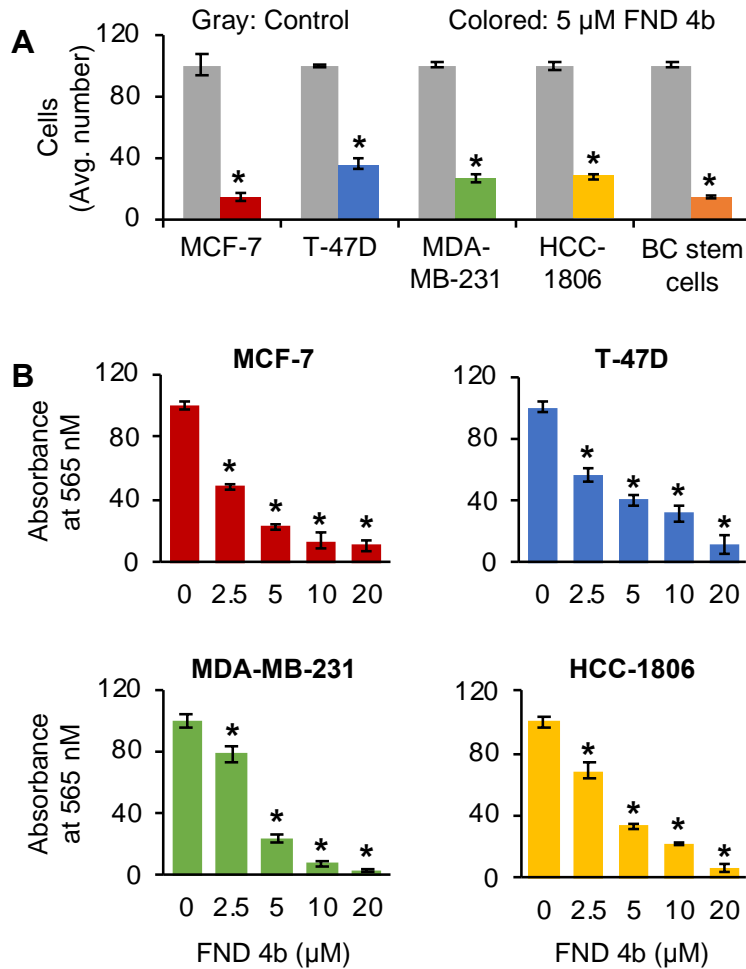

513

514 **Fig 3. AMPK $\alpha$  activation with FND-4b decreased proliferation of breast cancer**

515 **cells.** (A) Equal numbers of MCF-7, T-47D, MDA-MB-231, HCC-1806, or breast cancer

516 stem cells were grown in medium containing 0 or 5  $\mu$ M FND-4b for 72 h followed by cell

517 counting. (B) MCF-7, T-47D, MDA-MB-231, and HCC-1806 cells were grown in medium

518 containing different concentrations of FND-4b (0, 2.5, 5, 10, and 20  $\mu$ M) for 72 h before

519 SRB growth assays were performed. Data are presented as mean  $\pm$  SD from

520 experiments performed in triplicate (cell counting) or sextuplicate (SRB assays) and are

521 representative of three independent experiments. \* indicates p-value < 0.001.

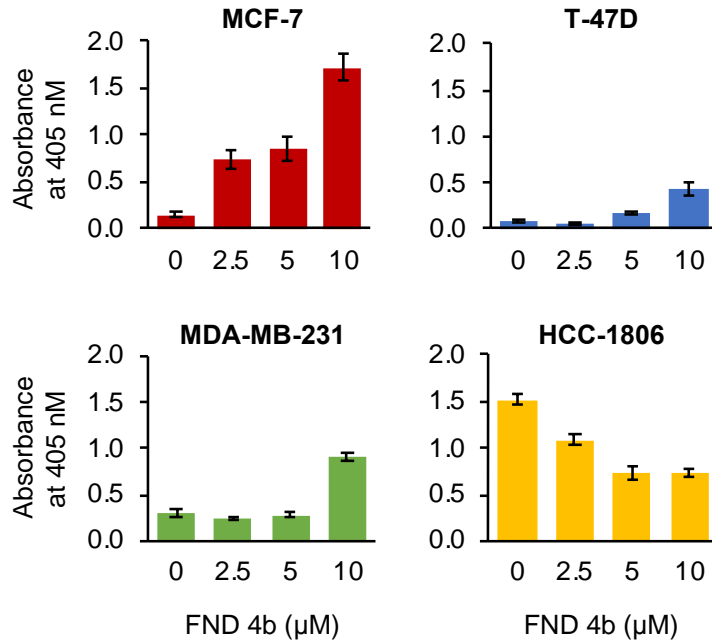

522

523 **Fig 4. AMPK $\alpha$  activation with FND-4b increased apoptosis of breast cancer cells.**

524 Equal numbers of MCF-7, T-47D, MDA-MB-231, or HCC-1806 cells were cultured in  
525 medium containing different concentrations of FND-4b (0, 2.5, 5, and 10  $\mu$ M) for 72 h  
526 before ELISA cell death assays were performed. Data are presented as mean  $\pm$  SD from  
527 an experiment performed in triplicate and are representative of three independent  
528 experiments. \* indicates p-value < 0.001.
